# Supplementary material
Source: MDPI journal article supplement (https://www.mdpi.com/1999-4907/12/2/144)
Supplement: s1 [file s1 › forests-1075321-supplementary.pdf]

Supplementary Materials

Changes in Soil C, N, and P Concentrations and Stoichiometry in Karst Trough Valley Area under Ecological Restoration: The Role of Slope aspect, Land use, and Soil depth

Tianyang Li, Jiangmin Zeng, Binghui He \* and Zhanpeng Chen

College of Resources and Environment, Southwest University, Chongqing 400715, China

\* Correspondence:hebinghui@swu.edu.cn; Tel.: +86-23-68251249

**Table S1.** Interactive effects of slope aspect, land use and soil depth on C, N, and P concentrations, stoichiometry and pH, microaggregates.

| Source                         | Significance level |       |       |       |       |       |       | 1000-<br>250-<br>μm | 250-<br>50<br>μm | <50<br>μm |
|--------------------------------|--------------------|-------|-------|-------|-------|-------|-------|---------------------|------------------|-----------|
|                                | C                  | N     | P     | C:N   | C:P   | N:P   | pH    |                     |                  |           |
| Aspect × land use              | 0.717              | 0.273 | 0.512 | 0.836 | 0.363 | 0.358 | 0.168 | 0.550               | 0.791            | 0.474     |
| Aspect × Soil depth            | 0.961              | 0.564 | 0.838 | 0.813 | 0.949 | 0.925 | 0.947 | 0.991               | 0.941            | 0.993     |
| Land use × Soil depth          | 0.915              | 0.983 | 0.121 | 0.821 | 0.812 | 0.841 | 0.996 | 0.923               | 0.301            | 0.751     |
| Aspect × Land use × Soil depth | 0.827              | 0.682 | 0.783 | 0.817 | 0.843 | 0.892 | 0.995 | 0.998               | 0.941            | 0.931     |
